# Supplementary material for: Genome-wide association analysis identifies new candidate risk loci for familial intracranial aneurysm in the French-Canadian population
Source: PubMed Central journal article supplement (PMC5847615; doi:10.1038/s41598-018-21603-7), 2018-03-12
Supplement: 41598_2018_21603_MOESM1_ESM.pdf [file 41598_2018_21603_MOESM1_ESM.pdf]

# **Genome-wide association analysis identifies new candidate risk loci for familial intracranial aneurysm in the French-Canadian population**

## **Authors and affiliations:**

Sirui Zhou<sup>1,2</sup>, Ziv Gan-Or<sup>1,3</sup>, Amirthagowri Ambalavanan<sup>1,3</sup>, Dongbing Lai<sup>4</sup>, Pingxing Xie<sup>1</sup>, Cynthia V. Bourassa<sup>1</sup>, Stephanie Strong<sup>1,3</sup>, Jay P. Ross<sup>1,3</sup>, Alexandre Dionne-Laporte<sup>1</sup>, Dan Spiegelman<sup>1</sup>, Nicolas Dupré<sup>5</sup>, Tatiana M Foroud<sup>4</sup>, Lan Xiong<sup>2,6</sup>, Patrick A. Dion<sup>1,7</sup>, Guy A. Rouleau<sup>1,7\*</sup>

1) Montreal Neurological Institute and Hospital, McGill University, Montréal, QC, Canada; 2) Department of Medicine, Faculty of Medicine, Université de Montréal, Montréal, QC, Canada; 3) Department of Human Genetics, McGill University, Montréal, QC, Canada; 4) Department of Medical and Molecular Genetics, Indiana University School of Medicine, Indianapolis, IN, USA; 5) Faculty of Medicine, Université Laval, Quebec, QC, Canada; 6) Centre de recherche, Institut universitaire en santé mentale de Montréal, QC, Canada; 7) Department of Neurology and Neurosurgery, McGill University, Montréal, QC, Canada.

## **\*Corresponding author:**

Guy A. Rouleau, Department of Neurology and Neurosurgery, McGill University, Montréal (QC), Canada, H3A 2B4. Tel: 514-398-2690. E-mail: [guy.rouleau@mcgill.ca](mailto:guy.rouleau@mcgill.ca).

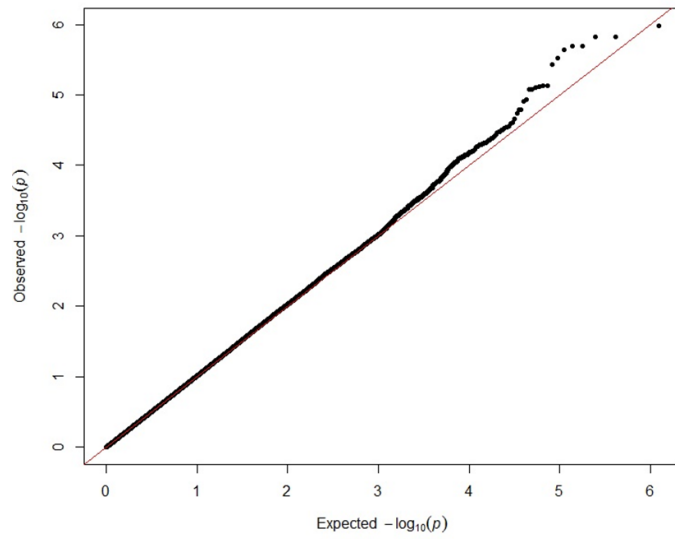

**Supplementary Figure S1.** Quantile-quantile plot of case-control logistic regression analysis

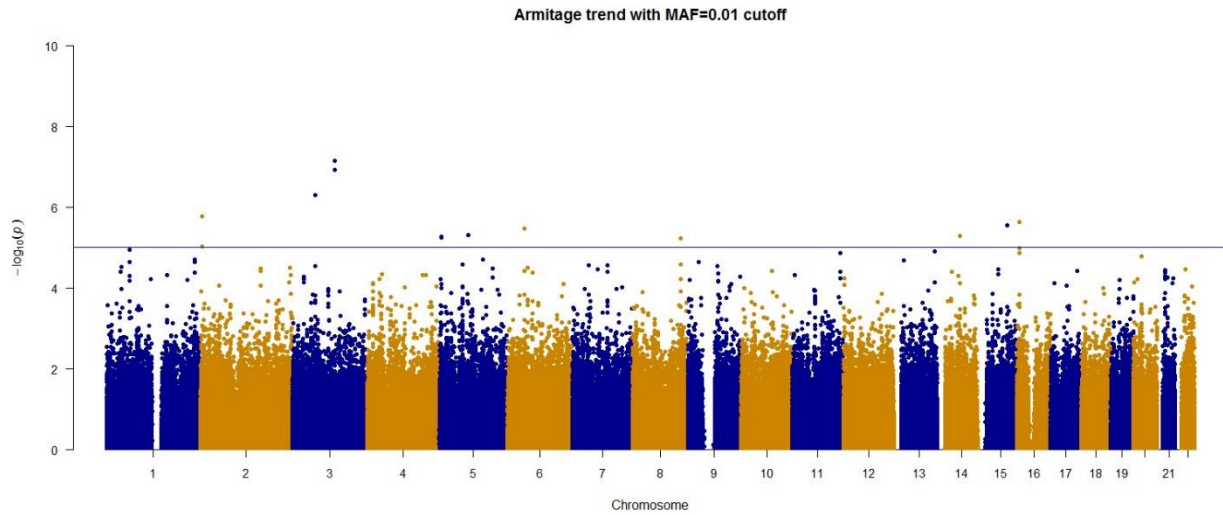

**Supplementary Figure S2.** Manhattan plot showing the result of the initial trend test

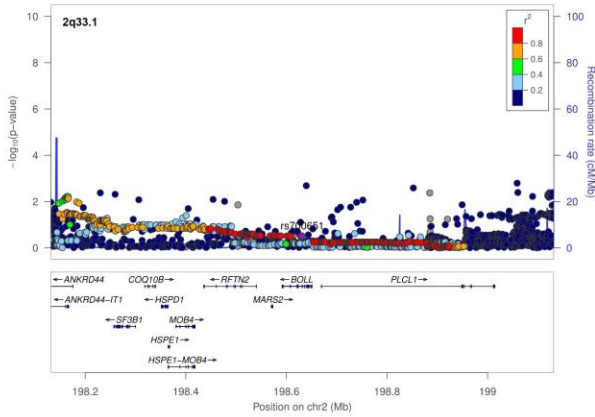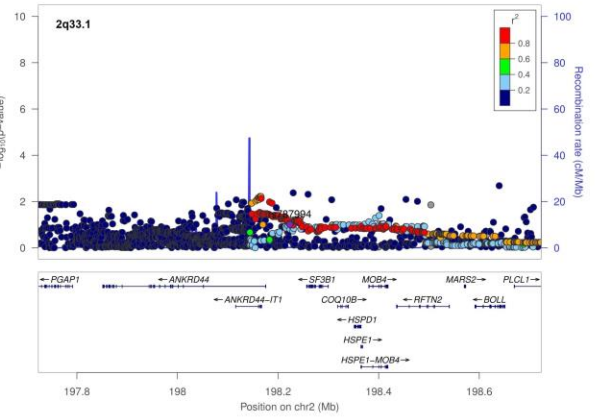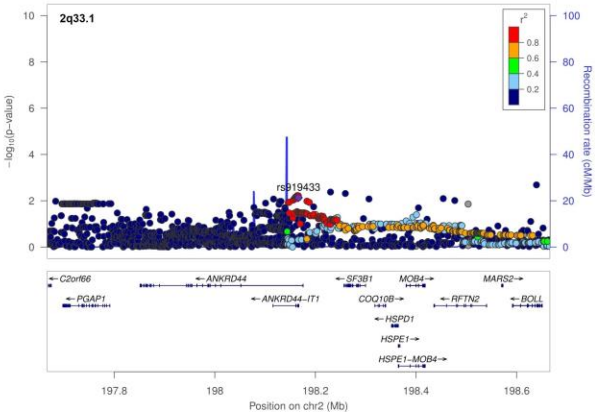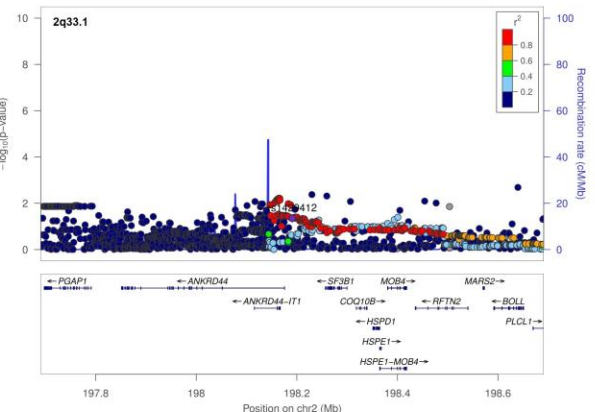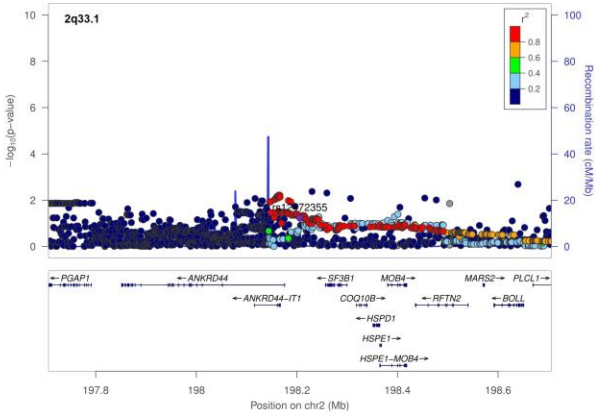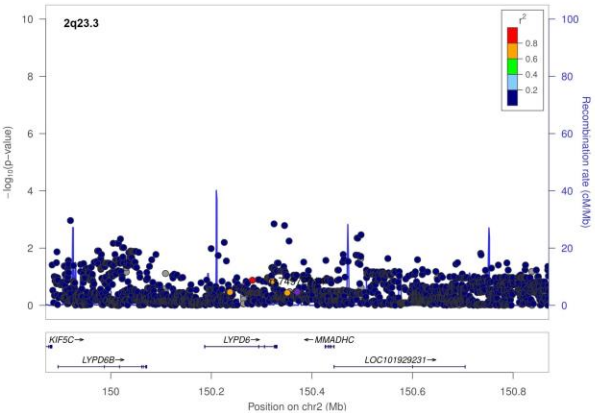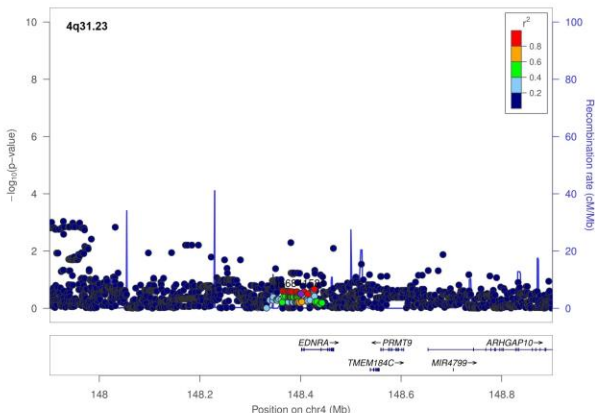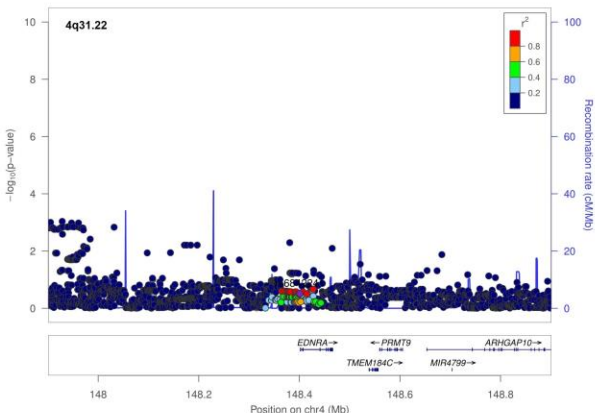

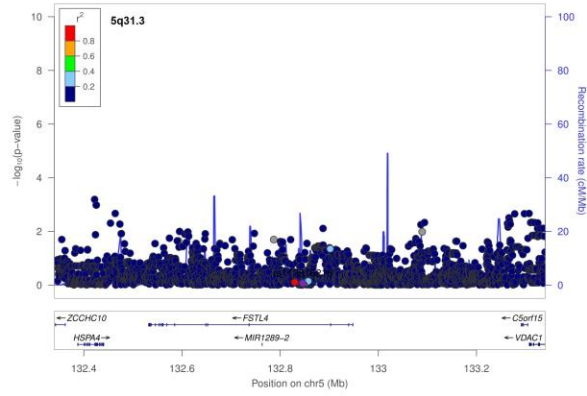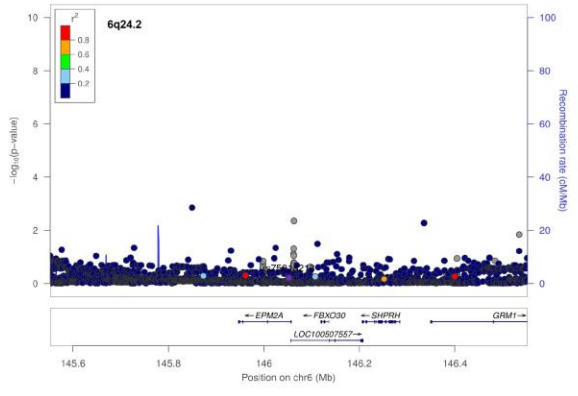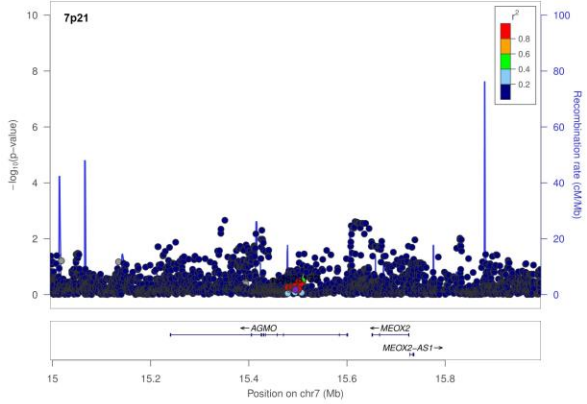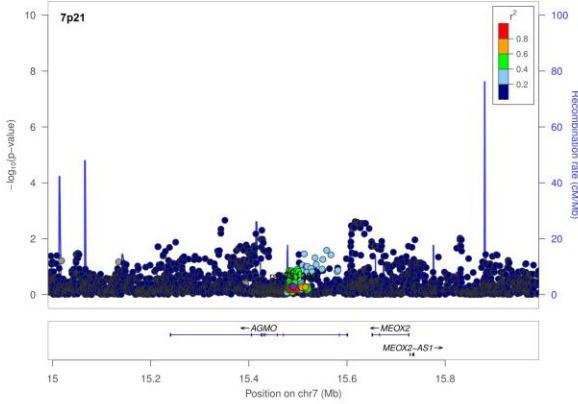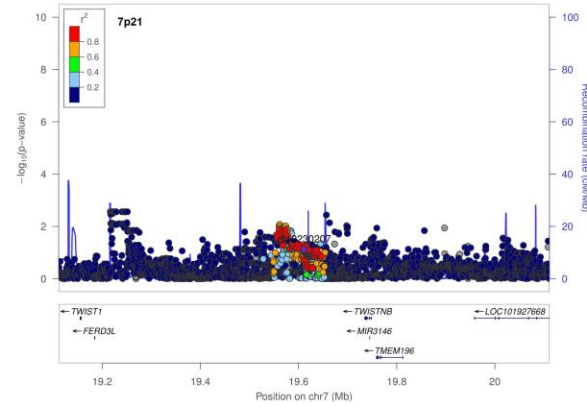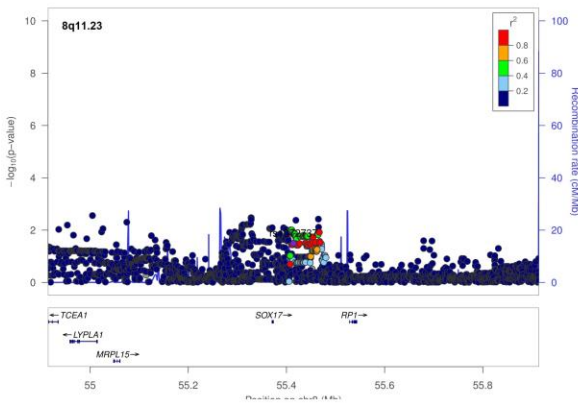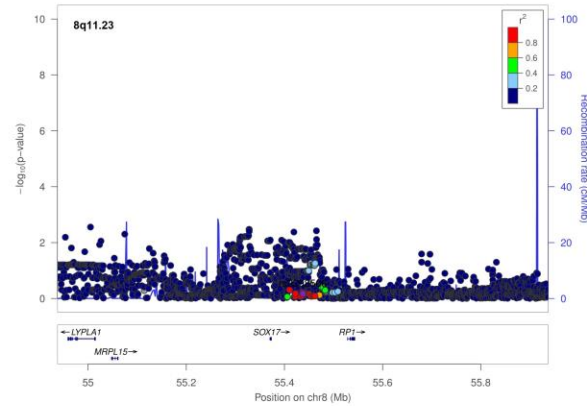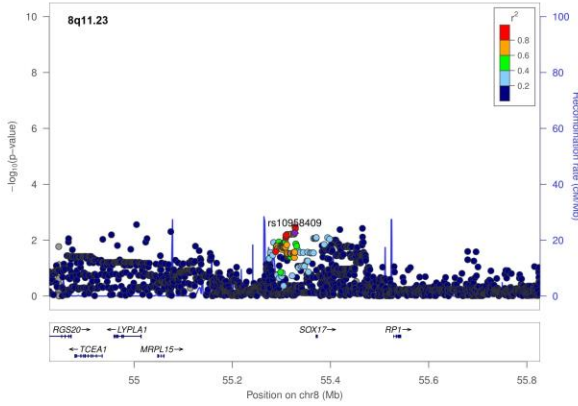

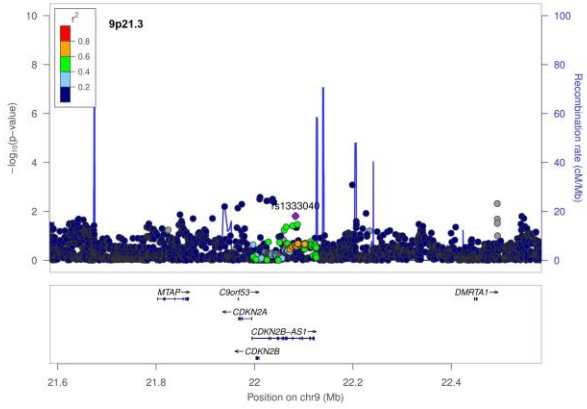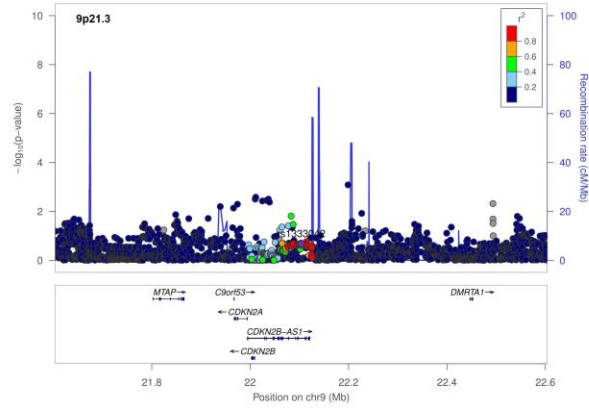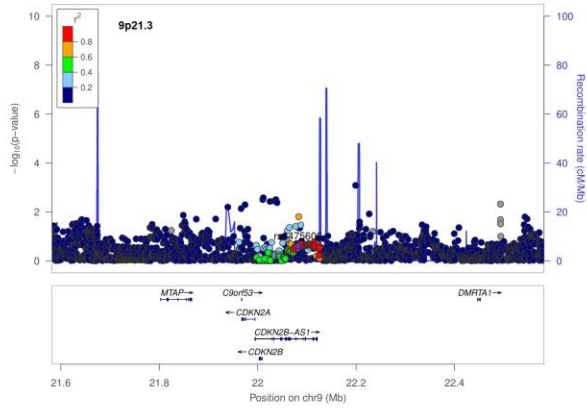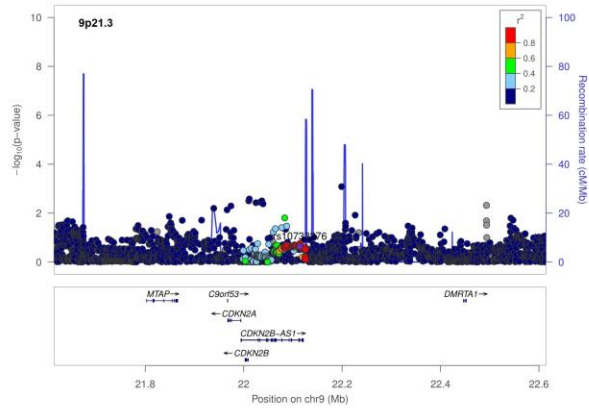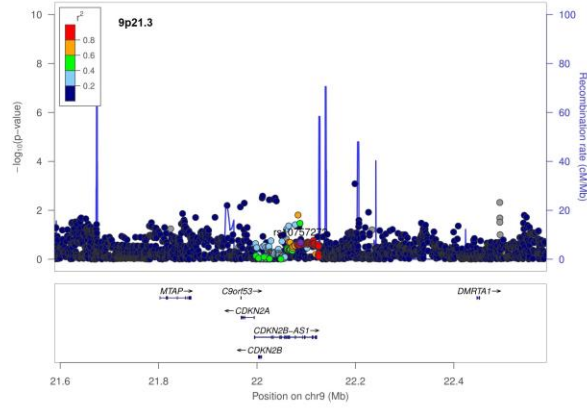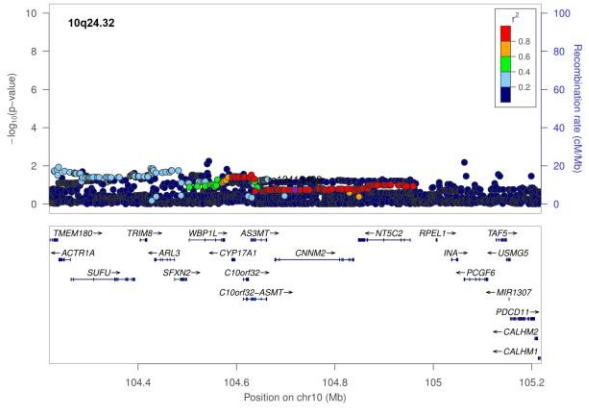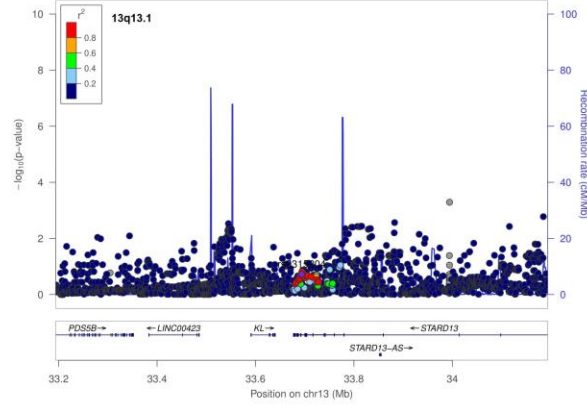

**Supplementary Figure S3.** Regional validation of 12 previous GWAS associated loci (23 previous genome-wide significant SNPs)

**Supplementary Table S1.**

| Marker      | CHR | POS      | Allele1 | Allele2 | Zscore | P-value  | Direction | P.FC       | WEIGHT.FC | BETA.FC   | SE.FC    | P.UI   | WEIGHT.UI | BETA.UI | SE.UI | LOCI    |
|-------------|-----|----------|---------|---------|--------|----------|-----------|------------|-----------|-----------|----------|--------|-----------|---------|-------|---------|
| rs76308736  | 8   | 10572792 | a       | g       | -4.753 | 2.01E-06 | --        | 0.0000045  | 1945      | -1.13246  | 0.246891 | 0.0093 | 4033      | 0.3     | 0.12  | 8p23.1  |
| rs79244282  | 8   | 10624237 | t       | c       | 4.714  | 2.43E-06 | ++        | 0.00000155 | 1945      | -1.28675  | 0.267805 | 0.0163 | 4033      | 0.3     | 0.12  | 8p23.1  |
| rs7084131   | 10  | 8399121  | a       | g       | 4.686  | 2.78E-06 | ++        | 0.00000483 | 1945      | 1.03693   | 0.226803 | 0.0114 | 4033      | -0.24   | 0.09  | 10p14   |
| rs72753560  | 5   | 31626036 | a       | g       | 4.644  | 3.42E-06 | ++        | 0.00000275 | 1945      | 0.698537  | 0.14898  | 0.0165 | 4033      | -0.15   | 0.06  | 5p13.3  |
| rs4867356   | 5   | 31623146 | t       | c       | -4.608 | 4.07E-06 | --        | 0.00000491 | 1945      | 0.680363  | 0.148924 | 0.0148 | 4033      | -0.16   | 0.06  | 5p13.3  |
| rs117537300 | 8   | 10743939 | a       | g       | -4.47  | 7.81E-06 | --        | 0.00000664 | 1945      | -1.21512  | 0.244413 | 0.0466 | 4033      | 0.21    | 0.11  | 8p23.1  |
| rs56034913  | 6   | 43619582 | a       | g       | 4.326  | 1.52E-05 | ++        | 0.00000238 | 1945      | -1.62618  | 0.344681 | 0.0465 | 4033      | 0.3     | 0.15  | 6p21.1  |
| rs6940568   | 6   | 43622285 | t       | c       | -4.309 | 1.64E-05 | --        | 0.00000192 | 1945      | -1.6476   | 0.346004 | 0.0525 | 4033      | 0.3     | 0.15  | 6p21.1  |
| rs148409800 | 6   | 43621108 | t       | c       | -4.275 | 1.91E-05 | --        | 0.00000192 | 1945      | -1.6476   | 0.346004 | 0.0577 | 4033      | 0.29    | 0.15  | 6p21.1  |
| rs114988842 | 6   | 43620110 | t       | c       | -4.23  | 2.34E-05 | --        | 0.00000192 | 1945      | -1.6476   | 0.346004 | 0.0653 | 4033      | 0.28    | 0.15  | 6p21.1  |
| rs78339483  | 6   | 43619226 | t       | c       | 4.202  | 2.65E-05 | ++        | 0.00000192 | 1945      | -1.6476   | 0.346004 | 0.0705 | 4033      | 0.28    | 0.15  | 6p21.1  |
| rs6915370   | 6   | 43617995 | a       | g       | 4.163  | 3.14E-05 | ++        | 0.00000192 | 1945      | -1.6476   | 0.346004 | 0.0781 | 4033      | 0.27    | 0.15  | 6p21.1  |
| rs6911069   | 6   | 43617687 | a       | g       | -4.151 | 3.31E-05 | --        | 0.00000192 | 1945      | -1.6476   | 0.346004 | 0.0806 | 4033      | 0.27    | 0.15  | 6p21.1  |
| rs8063371   | 16  | 8284980  | a       | g       | 4.104  | 4.07E-05 | ++        | 0.00000141 | 1945      | -0.563417 | 0.116817 | 0.0997 | 4033      | -0.08   | 0.05  | 16p13.2 |
| rs76079870  | 6   | 43615434 | a       | g       | 4.076  | 4.59E-05 | ++        | 0.00000192 | 1945      | -1.6476   | 0.346004 | 0.0979 | 4033      | 0.26    | 0.15  | 6p21.1  |
| rs142836448 | 3   | 29398714 | a       | g       | 4.055  | 5.01E-05 | ++        | 0.00000226 | 1945      | 0.786315  | 0.166286 | 0.0983 | 4033      | -0.12   | 0.07  | 3p24.1  |
| rs7749866   | 6   | 43605219 | a       | g       | -4.027 | 5.66E-05 | --        | 0.00000376 | 1945      | -1.53854  | 0.33271  | 0.0908 | 4033      | 0.26    | 0.15  | 6p21.1  |
| rs7750364   | 6   | 43602008 | t       | g       | -4.022 | 5.78E-05 | --        | 0.00000376 | 1945      | -1.53854  | 0.33271  | 0.092  | 4033      | 0.25    | 0.15  | 6p21.1  |
| rs111241794 | 6   | 43602538 | t       | c       | -4.022 | 5.78E-05 | --        | 0.00000376 | 1945      | -1.53854  | 0.33271  | 0.092  | 4033      | 0.25    | 0.15  | 6p21.1  |
| rs6938576   | 6   | 43599394 | a       | g       | -4.008 | 6.13E-05 | --        | 0.00000423 | 1945      | -1.5273   | 0.332027 | 0.092  | 4033      | 0.25    | 0.15  | 6p21.1  |
| rs962929    | 16  | 8285898  | a       | t       | 3.968  | 7.24E-05 | ++        | 0.00000186 | 1945      | -0.558539 | 0.11713  | 0.1285 | 4033      | -0.07   | 0.05  | 16p13.2 |
| rs13029421  | 2   | 28823571 | t       | c       | -3.954 | 7.68E-05 | --        | 0.00000323 | 1945      | -1.35667  | 0.291423 | 0.1139 | 4033      | 0.18    | 0.11  | 2p23.2  |
| rs142704507 | 6   | 43607074 | t       | c       | -3.95  | 7.80E-05 | --        | 0.00000286 | 1945      | -1.56469  | 0.334308 | 0.119  | 4033      | 0.24    | 0.16  | 6p21.1  |
| rs12660473  | 6   | 43611038 | a       | g       | -3.95  | 7.82E-05 | --        | 0.00000286 | 1945      | -1.56469  | 0.334308 | 0.1191 | 4033      | 0.24    | 0.16  | 6p21.1  |
| rs3757271   | 6   | 43603468 | t       | c       | -3.949 | 7.86E-05 | --        | 0.00000286 | 1945      | -1.56469  | 0.334308 | 0.1195 | 4033      | 0.24    | 0.16  | 6p21.1  |
| rs8044543   | 16  | 8285015  | a       | t       | -3.945 | 7.99E-05 | --        | 0.00000264 | 1945      | -0.549584 | 0.117009 | 0.1234 | 4033      | -0.07   | 0.05  | 16p13.2 |
| rs144339892 | 6   | 43601509 | t       | c       | -3.931 | 8.46E-05 | --        | 0.00000286 | 1945      | -1.56469  | 0.334308 | 0.1247 | 4033      | 0.24    | 0.16  | 6p21.1  |
| rs35295534  | 2   | 28829620 | a       | g       | -3.928 | 8.55E-05 | --        | 0.0000028  | 1945      | -1.34009  | 0.286047 | 0.1262 | 4033      | 0.17    | 0.11  | 2p23.2  |
| rs11638991  | 15  | 78569950 | a       | g       | 3.918  | 8.93E-05 | ++        | 0.00000491 | 1945      | -0.593136 | 0.129831 | 0.1102 | 4033      | 0.08    | 0.05  | 15q25.1 |
| rs8032417   | 15  | 78569930 | a       | g       | 3.865  | 0.000111 | ++        | 0.00000482 | 1945      | -0.593635 | 0.129826 | 0.1261 | 4033      | 0.08    | 0.05  | 15q25.1 |

|             |    |           |   |   |        |          |    |             |      |           |          |        |      |       |      |          |
|-------------|----|-----------|---|---|--------|----------|----|-------------|------|-----------|----------|--------|------|-------|------|----------|
| rs1554600   | 3  | 61157774  | c | g | -3.852 | 0.000117 | -- | 4.66E-09    | 1945 | -1.98215  | 0.338309 | 0.5345 | 4033 | 0.11  | 0.17 | 3p14.2   |
| rs13028204  | 2  | 28853137  | c | g | 3.846  | 0.00012  | ++ | 0.00000239  | 1945 | -1.38092  | 0.29275  | 0.1597 | 4033 | 0.16  | 0.11 | 2p23.2   |
| rs982855    | 16 | 8297685   | t | c | 3.843  | 0.000122 | ++ | 0.00000178  | 1945 | -0.557424 | 0.116681 | 0.1735 | 4033 | -0.06 | 0.05 | 16p13.2  |
| rs7190604   | 16 | 8295039   | a | g | 3.834  | 0.000126 | ++ | 0.00000242  | 1945 | -0.551713 | 0.11701  | 0.1635 | 4033 | -0.06 | 0.05 | 16p13.2  |
| rs71443090  | 2  | 28871783  | c | g | -3.816 | 0.000136 | -- | 0.00000441  | 1945 | -1.33072  | 0.289858 | 0.1449 | 4033 | 0.16  | 0.11 | 2p23.2   |
| rs114999403 | 3  | 131692910 | t | g | 3.814  | 0.000137 | ++ | 0.00000267  | 1945 | -2.01095  | 0.428374 | 0.1666 | 4033 | 0.25  | 0.18 | 3q22.1   |
| rs13020458  | 2  | 28857714  | t | c | -3.81  | 0.000139 | -- | 0.00000365  | 1945 | -1.34607  | 0.290695 | 0.1548 | 4033 | 0.16  | 0.11 | 2p23.2   |
| rs67702090  | 2  | 28866637  | a | t | 3.805  | 0.000142 | ++ | 0.0000041   | 1945 | -1.33657  | 0.290173 | 0.1517 | 4033 | 0.16  | 0.11 | 2p23.2   |
| rs11863984  | 16 | 8290916   | t | c | 3.783  | 0.000155 | ++ | 0.00000211  | 1945 | -0.553815 | 0.11678  | 0.1893 | 4033 | -0.06 | 0.05 | 16p13.2  |
| rs116130729 | 4  | 16012786  | t | c | -3.778 | 0.000158 | -- | 0.00000018  | 1945 | -1.79302  | 0.343542 | 0.3291 | 4033 | 0.2   | 0.2  | 4p15.32  |
| rs77639126  | 2  | 25598423  | a | c | 3.774  | 0.000161 | ++ | 0.00000235  | 1945 | -1.58283  | 0.335271 | 0.188  | 4033 | 0.25  | 0.19 | 2p23.3   |
| rs2360850   | 16 | 8293989   | a | g | 3.754  | 0.000174 | ++ | 0.00000242  | 1945 | -0.551713 | 0.11701  | 0.1949 | 4033 | -0.06 | 0.05 | 16p13.2  |
| rs7203131   | 16 | 8296805   | a | g | 3.747  | 0.000179 | ++ | 0.00000278  | 1945 | -0.54768  | 0.116865 | 0.1911 | 4033 | -0.06 | 0.05 | 16p13.2  |
| rs4482268   | 16 | 8297350   | t | g | 3.743  | 0.000182 | ++ | 0.00000293  | 1945 | -0.546432 | 0.116866 | 0.1901 | 4033 | -0.06 | 0.05 | 16p13.2  |
| rs982854    | 16 | 8297724   | t | c | 3.735  | 0.000188 | ++ | 0.00000285  | 1945 | -0.547261 | 0.116901 | 0.1948 | 4033 | -0.06 | 0.05 | 16p13.2  |
| rs2039332   | 9  | 9138642   | t | c | -3.735 | 0.000188 | -- | 0.00000148  | 1945 | -2.05874  | 0.42766  | 0.2285 | 4033 | 0.41  | 0.34 | 9p23     |
| rs7195828   | 16 | 8295407   | a | g | 3.726  | 0.000194 | ++ | 0.00000278  | 1945 | -0.54768  | 0.116865 | 0.1997 | 4033 | -0.06 | 0.05 | 16p13.2  |
| rs141084492 | 3  | 61158840  | t | c | 3.715  | 0.000203 | ++ | 1.92E-08    | 1945 | -1.91471  | 0.340729 | 0.5346 | 4033 | 0.11  | 0.17 | 3p14.2   |
| rs78181937  | 2  | 25605740  | c | g | -3.697 | 0.000218 | -- | 0.00000235  | 1945 | -1.58283  | 0.335271 | 0.2214 | 4033 | 0.23  | 0.19 | 2p23.3   |
| rs1462099   | 16 | 8298133   | a | g | 3.656  | 0.000256 | ++ | 0.00000439  | 1945 | -0.53757  | 0.117072 | 0.2068 | 4033 | -0.06 | 0.05 | 16p13.2  |
| rs7989887   | 13 | 25681112  | t | c | 3.613  | 0.000303 | ++ | 0.000000693 | 1945 | -1.00943  | 0.203382 | 0.341  | 4033 | 0.08  | 0.08 | 13q12.13 |
| rs3002218   | 13 | 25683444  | a | g | -3.586 | 0.000336 | -- | 0.000000731 | 1945 | -1.00686  | 0.203286 | 0.3544 | 4033 | 0.07  | 0.08 | 13q12.13 |
| rs3002219   | 13 | 25683894  | t | c | -3.582 | 0.000341 | -- | 0.000000731 | 1945 | -1.00686  | 0.203286 | 0.3568 | 4033 | 0.07  | 0.08 | 13q12.13 |
| rs146929064 | 7  | 44346336  | a | c | 3.491  | 0.000481 | ++ | 0.00000132  | 1945 | -1.83941  | 0.38035  | 0.3725 | 4033 | 0.18  | 0.2  | 7p13     |
| rs79515922  | 13 | 25684362  | a | g | -3.483 | 0.000495 | -- | 0.0000017   | 1945 | -0.974484 | 0.203608 | 0.359  | 4033 | 0.07  | 0.08 | 13q12.13 |
| rs12430973  | 13 | 25687428  | a | c | 3.477  | 0.000507 | ++ | 0.00000162  | 1945 | -0.977041 | 0.203704 | 0.3667 | 4033 | 0.07  | 0.08 | 13q12.13 |
| rs61949677  | 13 | 25697959  | a | g | -3.45  | 0.00056  | -- | 0.00000137  | 1945 | -0.985199 | 0.203994 | 0.3971 | 4033 | 0.07  | 0.08 | 13q12.13 |
| rs9511648   | 13 | 25696076  | t | c | -3.446 | 0.00057  | -- | 0.00000145  | 1945 | -0.982214 | 0.203877 | 0.3958 | 4033 | 0.07  | 0.08 | 13q12.13 |
| rs9511647   | 13 | 25694482  | a | c | -3.444 | 0.000574 | -- | 0.00000145  | 1945 | -0.982214 | 0.203877 | 0.3971 | 4033 | 0.07  | 0.08 | 13q12.13 |
| rs2994902   | 13 | 25690566  | t | c | 3.435  | 0.000592 | ++ | 0.00000172  | 1945 | -0.973997 | 0.203588 | 0.3897 | 4033 | 0.07  | 0.08 | 13q12.13 |
| rs9511641   | 13 | 25690765  | a | t | 3.425  | 0.000616 | ++ | 0.00000172  | 1945 | -0.973997 | 0.203588 | 0.3969 | 4033 | 0.07  | 0.08 | 13q12.13 |
| rs2399431   | 3  | 112280706 | c | g | -3.372 | 0.000747 | -- | 0.000000633 | 1945 | -2.44035  | 0.489933 | 0.5182 | 4033 | -0.15 | 0.23 | 3q13.2   |
| rs9511655   | 13 | 25711337  | a | g | -3.363 | 0.000771 | -- | 0.00000271  | 1945 | -0.95984  | 0.204584 | 0.4029 | 4033 | 0.07  | 0.08 | 13q12.13 |
| rs138031402 | 16 | 8960325   | a | g | -3.327 | 0.000879 | -- | 0.000000887 | 1945 | -2.40373  | 0.489044 | 0.5243 | 4033 | 0.22  | 0.35 | 16p13.2  |



|             |   |           |   |   |        |          |    |             |      |          |          |        |      |       |      |        |
|-------------|---|-----------|---|---|--------|----------|----|-------------|------|----------|----------|--------|------|-------|------|--------|
| rs2705520   | 3 | 112269287 | a | g | -3.315 | 0.000917 | -- | 0.000000633 | 1945 | -2.44035 | 0.489933 | 0.564  | 4033 | -0.13 | 0.23 | 3q13.2 |
| rs1877364   | 3 | 112303231 | t | c | 3.313  | 0.000924 | ++ | 0.000000633 | 1945 | -2.44035 | 0.489933 | 0.5659 | 4033 | -0.13 | 0.23 | 3q13.2 |
| rs2638034   | 3 | 112305873 | a | g | 3.313  | 0.000924 | ++ | 0.000000633 | 1945 | -2.44035 | 0.489933 | 0.5659 | 4033 | -0.13 | 0.23 | 3q13.2 |
| rs1385527   | 3 | 112301244 | c | g | 3.312  | 0.000925 | ++ | 0.000000633 | 1945 | -2.44035 | 0.489933 | 0.5661 | 4033 | -0.13 | 0.23 | 3q13.2 |
| rs1472106   | 3 | 112298471 | t | c | 3.312  | 0.000926 | ++ | 0.000000633 | 1945 | -2.44035 | 0.489933 | 0.5664 | 4033 | -0.13 | 0.23 | 3q13.2 |
| rs1532198   | 3 | 112298523 | c | g | 3.312  | 0.000927 | ++ | 0.000000633 | 1945 | -2.44035 | 0.489933 | 0.5665 | 4033 | -0.13 | 0.23 | 3q13.2 |
| rs2969894   | 3 | 112298995 | c | g | -3.312 | 0.000927 | -- | 0.000000633 | 1945 | -2.44035 | 0.489933 | 0.5667 | 4033 | -0.13 | 0.23 | 3q13.2 |
| rs2705551   | 3 | 112310253 | t | c | -3.311 | 0.000929 | -- | 0.000000633 | 1945 | -2.44035 | 0.489933 | 0.5672 | 4033 | -0.13 | 0.23 | 3q13.2 |
| rs2933139   | 3 | 112294719 | t | g | -3.311 | 0.000931 | -- | 0.000000633 | 1945 | -2.44035 | 0.489933 | 0.5675 | 4033 | -0.13 | 0.23 | 3q13.2 |
| rs2705510   | 3 | 112288393 | a | g | -3.31  | 0.000934 | -- | 0.000000633 | 1945 | -2.44035 | 0.489933 | 0.5684 | 4033 | -0.13 | 0.23 | 3q13.2 |
| rs2638030   | 3 | 112285190 | a | g | -3.309 | 0.000936 | -- | 0.000000633 | 1945 | -2.44035 | 0.489933 | 0.5688 | 4033 | -0.13 | 0.23 | 3q13.2 |
| rs2638038   | 3 | 112295980 | a | g | 3.309  | 0.000938 | ++ | 0.000000633 | 1945 | -2.44035 | 0.489933 | 0.5692 | 4033 | -0.13 | 0.23 | 3q13.2 |
| rs2705506   | 3 | 112291218 | t | g | 3.308  | 0.00094  | ++ | 0.000000633 | 1945 | -2.44035 | 0.489933 | 0.5698 | 4033 | -0.13 | 0.23 | 3q13.2 |
| rs1844864   | 3 | 112311134 | t | c | 3.308  | 0.000941 | ++ | 0.000000633 | 1945 | -2.44035 | 0.489933 | 0.5701 | 4033 | -0.13 | 0.23 | 3q13.2 |
| rs2464612   | 3 | 112284302 | t | c | -3.307 | 0.000944 | -- | 0.000000633 | 1945 | -2.44035 | 0.489933 | 0.5707 | 4033 | -0.13 | 0.23 | 3q13.2 |
| rs986883    | 3 | 112317604 | a | c | 3.303  | 0.000956 | ++ | 0.000000633 | 1945 | -2.44035 | 0.489933 | 0.5738 | 4033 | -0.13 | 0.23 | 3q13.2 |
| rs971832    | 3 | 112272647 | a | t | 3.299  | 0.000969 | ++ | 0.000000633 | 1945 | -2.44035 | 0.489933 | 0.5768 | 4033 | -0.13 | 0.23 | 3q13.2 |
| rs2705554   | 3 | 112273546 | t | c | 3.295  | 0.000984 | ++ | 0.000000633 | 1945 | -2.44035 | 0.489933 | 0.5804 | 4033 | -0.12 | 0.23 | 3q13.2 |
| rs1472107   | 3 | 112298345 | a | g | -3.294 | 0.000988 | -- | 0.00000105  | 1945 | -2.36768 | 0.484976 | 0.5352 | 4033 | -0.14 | 0.23 | 3q13.2 |
| rs2638025   | 3 | 112269748 | a | c | 3.294  | 0.000988 | ++ | 0.000000633 | 1945 | -2.44035 | 0.489933 | 0.5814 | 4033 | -0.12 | 0.23 | 3q13.2 |
| rs2933140   | 3 | 112250872 | a | g | 3.293  | 0.00099  | ++ | 0.000000633 | 1945 | -2.44035 | 0.489933 | 0.5818 | 4033 | -0.12 | 0.23 | 3q13.2 |
| rs1491629   | 3 | 112258622 | t | c | 3.293  | 0.000991 | ++ | 0.000000633 | 1945 | -2.44035 | 0.489933 | 0.5822 | 4033 | -0.12 | 0.23 | 3q13.2 |
| rs2668216   | 3 | 112295615 | a | g | 3.293  | 0.000992 | ++ | 0.00000105  | 1945 | -2.36768 | 0.484976 | 0.5361 | 4033 | -0.14 | 0.23 | 3q13.2 |
| rs2705514   | 3 | 112321921 | t | c | 3.29   | 0.001004 | ++ | 0.000000633 | 1945 | -2.44035 | 0.489933 | 0.5851 | 4033 | -0.12 | 0.23 | 3q13.2 |
| rs1388442   | 3 | 112257291 | a | g | 3.289  | 0.001006 | ++ | 0.000000633 | 1945 | -2.44035 | 0.489933 | 0.5857 | 4033 | -0.12 | 0.23 | 3q13.2 |
| rs2638041   | 3 | 112248774 | t | g | 3.289  | 0.001007 | ++ | 0.000000633 | 1945 | -2.44035 | 0.489933 | 0.5859 | 4033 | -0.12 | 0.23 | 3q13.2 |
| rs2705563   | 3 | 112258124 | a | t | -3.289 | 0.001007 | -- | 0.000000633 | 1945 | -2.44035 | 0.489933 | 0.5859 | 4033 | -0.12 | 0.23 | 3q13.2 |
| rs2638043   | 3 | 112245836 | a | g | -3.288 | 0.001008 | -- | 0.000000633 | 1945 | -2.44035 | 0.489933 | 0.5862 | 4033 | -0.12 | 0.23 | 3q13.2 |
| rs2638044   | 3 | 112245295 | a | g | -3.266 | 0.001091 | -- | 0.000000774 | 1945 | -2.4111  | 0.487894 | 0.5862 | 4033 | -0.12 | 0.23 | 3q13.2 |
| rs1877362   | 3 | 112331590 | a | g | 3.234  | 0.00122  | ++ | 0.000000844 | 1945 | -2.39866 | 0.487047 | 0.6048 | 4033 | -0.12 | 0.23 | 3q13.2 |
| rs10934177  | 3 | 112332147 | t | c | -3.231 | 0.001232 | -- | 0.000000844 | 1945 | -2.39866 | 0.487047 | 0.6072 | 4033 | -0.12 | 0.23 | 3q13.2 |
| rs116704890 | 3 | 112311803 | a | g | -3.231 | 0.001233 | -- | 0.000000633 | 1945 | -2.44035 | 0.489933 | 0.6349 | 4033 | 0.11  | 0.23 | 3q13.2 |
| rs1552707   | 3 | 112331348 | t | c | -3.231 | 0.001234 | -- | 0.000000844 | 1945 | -2.39866 | 0.487047 | 0.6076 | 4033 | -0.12 | 0.23 | 3q13.2 |
| rs114685196 | 3 | 112282665 | a | g | 3.229  | 0.001244 | ++ | 0.000000633 | 1945 | -2.44035 | 0.489933 | 0.637  | 4033 | 0.11  | 0.23 | 3q13.2 |

|             |    |           |   |   |        |          |    |             |      |           |          |        |      |       |      |          |
|-------------|----|-----------|---|---|--------|----------|----|-------------|------|-----------|----------|--------|------|-------|------|----------|
| rs7618978   | 3  | 112330130 | t | c | -3.228 | 0.001249 | -- | 0.000000844 | 1945 | -2.39866  | 0.487047 | 0.6105 | 4033 | -0.12 | 0.23 | 3q13.2   |
| rs145651986 | 3  | 112248033 | a | g | -3.217 | 0.001293 | -- | 0.000000633 | 1945 | -2.44035  | 0.489933 | 0.6468 | 4033 | 0.11  | 0.23 | 3q13.2   |
| rs9511628   | 13 | 25666239  | a | g | -3.195 | 0.001401 | -- | 0.00000275  | 1945 | -1.06966  | 0.228125 | 0.5266 | 4033 | 0.06  | 0.1  | 13q12.13 |
| rs73098967  | 3  | 61220002  | a | g | 3.116  | 0.001835 | ++ | 0.000000267 | 1945 | -1.40637  | 0.273343 | 0.8258 | 4033 | 0.03  | 0.12 | 3p14.2   |
| rs73098971  | 3  | 61223331  | a | g | 3.112  | 0.001857 | ++ | 0.000000267 | 1945 | -1.40637  | 0.273343 | 0.8292 | 4033 | 0.03  | 0.12 | 3p14.2   |
| rs1207426   | 2  | 206154365 | t | c | 3.085  | 0.002036 | ++ | 0.0000041   | 1945 | -0.875028 | 0.189958 | 0.5775 | 4033 | -0.04 | 0.08 | 2p33.3   |
| rs11714398  | 3  | 61226363  | a | g | -3.077 | 0.002093 | -- | 0.000000267 | 1945 | -1.40637  | 0.273343 | 0.863  | 4033 | 0.02  | 0.12 | 3p14.2   |
| rs55994842  | 3  | 61203154  | a | g | -3.076 | 0.002099 | -- | 0.00000108  | 1945 | -1.31068  | 0.268776 | 0.7201 | 4033 | 0.04  | 0.12 | 3p14.2   |
| rs4688348   | 3  | 61194447  | t | c | 3.072  | 0.002128 | ++ | 0.00000108  | 1945 | -1.31068  | 0.268776 | 0.7239 | 4033 | 0.04  | 0.12 | 3p14.2   |
| rs73098963  | 3  | 61218137  | a | t | -3.067 | 0.00216  | -- | 0.000000267 | 1945 | -1.40637  | 0.273343 | 0.872  | 4033 | 0.02  | 0.12 | 3p14.2   |
| rs73097006  | 3  | 61186195  | a | c | -3.066 | 0.002169 | -- | 0.00000108  | 1945 | -1.31068  | 0.268776 | 0.729  | 4033 | 0.04  | 0.12 | 3p14.2   |
| rs192887436 | 3  | 61188626  | a | g | 3.054  | 0.002256 | ++ | 0.00000108  | 1945 | -1.31068  | 0.268776 | 0.7398 | 4033 | 0.04  | 0.12 | 3p14.2   |
| rs17064638  | 3  | 61186878  | a | g | -3.053 | 0.002267 | -- | 0.00000108  | 1945 | -1.31068  | 0.268776 | 0.7412 | 4033 | 0.04  | 0.12 | 3p14.2   |
| rs1207415   | 2  | 206169925 | t | c | 3.031  | 0.002436 | ++ | 0.00000493  | 1945 | -0.86818  | 0.190067 | 0.6042 | 4033 | -0.04 | 0.08 | 2p33.3   |
| rs11714472  | 3  | 61226572  | a | g | -3.009 | 0.002617 | -- | 0.000000782 | 1945 | -1.38208  | 0.279781 | 0.8154 | 4033 | 0.03  | 0.12 | 3p14.2   |
| rs17583011  | 13 | 54424384  | a | g | -2.99  | 0.002792 | -- | 0.00000133  | 1945 | -1.53832  | 0.318175 | 0.7778 | 4033 | 0.03  | 0.12 | 13q14.3  |
| rs73104225  | 3  | 60995581  | t | g | -2.974 | 0.00294  | -- | 0.00000305  | 1945 | -2.23132  | 0.478031 | 0.7044 | 4033 | 0.07  | 0.18 | 3p14.2   |
| rs139102048 | 3  | 61196860  | t | c | -2.966 | 0.003013 | -- | 0.00000343  | 1945 | -1.27397  | 0.274386 | 0.6987 | 4033 | 0.05  | 0.12 | 3p14.2   |
| rs140866572 | 3  | 61197457  | t | c | -2.965 | 0.003025 | -- | 0.00000343  | 1945 | -1.27397  | 0.274386 | 0.6998 | 4033 | 0.05  | 0.12 | 3p14.2   |
| rs56174846  | 3  | 61225234  | t | c | -2.956 | 0.003117 | -- | 0.000000782 | 1945 | -1.38208  | 0.279781 | 0.8663 | 4033 | 0.02  | 0.12 | 3p14.2   |
| rs73098993  | 3  | 61230478  | a | g | 2.94   | 0.003283 | ++ | 0.00000141  | 1945 | -1.33911  | 0.277653 | 0.8185 | 4033 | 0.03  | 0.12 | 3p14.2   |
| rs73098988  | 3  | 61227542  | t | c | -2.923 | 0.003467 | -- | 0.000000782 | 1945 | -1.38208  | 0.279781 | 0.898  | 4033 | 0.02  | 0.12 | 3p14.2   |
| rs116375594 | 3  | 61197014  | c | g | 2.902  | 0.003705 | ++ | 0.00000343  | 1945 | -1.27397  | 0.274386 | 0.7574 | 4033 | 0.04  | 0.12 | 3p14.2   |
| rs114375292 | 13 | 54413853  | t | c | 2.847  | 0.004414 | ++ | 0.000000725 | 1945 | -1.55348  | 0.313554 | 0.9797 | 4033 | 0     | 0.13 | 13q14.3  |
| rs1357639   | 3  | 61211013  | a | t | 2.794  | 0.005211 | ++ | 0.00000018  | 1945 | -1.25222  | 0.262258 | 0.9319 | 4033 | 0.01  | 0.12 | 3p14.2   |
| rs73161791  | 22 | 36455779  | t | c | -2.705 | 0.006829 | -- | 0.00000365  | 1945 | -2.59289  | 0.559998 | 0.938  | 4033 | 0.02  | 0.29 | 22q12.3  |
| rs11699714  | 20 | 1613011   | t | c | 2.647  | 0.008133 | ++ | 0.00000367  | 1945 | -1.18146  | 0.255218 | 0.9942 | 4033 | 0     | 0.11 | 20p13    |
| rs55952004  | 20 | 1614600   | a | t | -2.625 | 0.008671 | -- | 0.000004716 | 1945 | -1.16432  | 0.254383 | 0.9864 | 4033 | 0     | 0.11 | 20p13    |
| rs56040592  | 20 | 1611918   | a | g | -2.591 | 0.009575 | +  | 0.00000198  | 1945 | -1.22327  | 0.257248 | 0.8822 | 4033 | -0.02 | 0.11 | 20p13    |
| rs2705535   | 3  | 112208927 | t | c | -2.59  | 0.009588 | +  | 0.00000327  | 1945 | -1.86427  | 0.40064  | 0.9381 | 4033 | -0.01 | 0.18 | 3q13.2   |
| rs10495046  | 1  | 217417902 | a | g | -2.563 | 0.01037  | +  | 0.00000474  | 1945 | -1.18702  | 0.259403 | 0.9545 | 4033 | -0.01 | 0.11 | 1q41     |
| rs12058987  | 1  | 217421015 | a | c | -2.107 | 0.03515  | +  | 0.00000133  | 1945 | -1.47758  | 0.305576 | 0.4277 | 4033 | -0.1  | 0.13 | 1q41     |
| rs79571254  | 8  | 127902373 | t | c | -1.899 | 0.05762  | +  | 0.00000162  | 1945 | 0.706359  | 0.147273 | 0.3082 | 4033 | 0.06  | 0.06 | 8q24.21  |
| rs6772523   | 3  | 61190420  | a | g | 1.867  | 0.06185  | +- | 0.00000492  | 1945 | -0.949471 | 0.207846 | 0.3687 | 4033 | -0.09 | 0.1  | 3p14.2   |

|                    |    |           |   |   |        |         |    |             |      |           |          |        |      |       |      |         |
|--------------------|----|-----------|---|---|--------|---------|----|-------------|------|-----------|----------|--------|------|-------|------|---------|
| <b>rs59910027</b>  | 3  | 61194299  | t | g | 1.857  | 0.06336 | +- | 0.00000492  | 1945 | -0.949471 | 0.207846 | 0.3618 | 4033 | -0.09 | 0.1  | 3p14.2  |
| <b>rs112000237</b> | 8  | 127911357 | a | g | 1.854  | 0.06378 | +- | 0.00000162  | 1945 | 0.706359  | 0.147273 | 0.283  | 4033 | 0.07  | 0.06 | 8q24.21 |
| <b>rs150148362</b> | 1  | 234191488 | a | g | -1.831 | 0.06716 | -+ | 0.000000816 | 1945 | -2.55442  | 0.517978 | 0.2317 | 4033 | -0.41 | 0.35 | 1q42.2  |
| <b>rs56268052</b>  | 3  | 61215230  | a | g | -1.78  | 0.07513 | -+ | 0.00000283  | 1945 | -0.978093 | 0.208875 | 0.2778 | 4033 | -0.1  | 0.1  | 3p14.2  |
| <b>rs7011138</b>   | 8  | 127922200 | a | t | -1.579 | 0.1143  | -+ | 0.00000135  | 1945 | 0.72319   | 0.149667 | 0.1518 | 4033 | 0.09  | 0.06 | 8q24.21 |
| <b>rs151319278</b> | 13 | 44537888  | a | g | -1.11  | 0.2671  | -+ | 0.00000458  | 1945 | -1.89937  | 0.414408 | 0.067  | 4033 | -0.45 | 0.25 | 13q14.3 |

**Supplementary Table S2.** FBAT-O result of 50 *FHIT* variants with significant association ( $p < 0.05$ ) in Nunavik Inuit

| Marker     | chr | pos      | afreq | fam# | S-E(S) | Var(S) | Z      | P        | Offset |
|------------|-----|----------|-------|------|--------|--------|--------|----------|--------|
| rs780365   | 3   | 59761789 | 0.377 | 14   | 6.842  | 5.254  | 2.985  | 0.002839 | 0.231  |
| rs17361653 | 3   | 59771515 | 0.462 | 18   | -6.903 | 5.489  | -2.946 | 0.003216 | 0.203  |
| rs9809480  | 3   | 60448671 | 0.23  | 14   | 5.032  | 3.155  | 2.833  | 0.004615 | 0.277  |
| rs1597104  | 3   | 60453227 | 0.23  | 14   | 5.032  | 3.155  | 2.833  | 0.004615 | 0.277  |
| rs7621114  | 3   | 60418721 | 0.205 | 13   | 4.663  | 3.003  | 2.691  | 0.007123 | 0.257  |
| rs2255772  | 3   | 60557852 | 0.207 | 10   | 4.039  | 2.519  | 2.545  | 0.010928 | 0.245  |
| rs2687189  | 3   | 60423009 | 0.438 | 18   | 4.701  | 3.768  | 2.422  | 0.015436 | 0.095  |
| rs445057   | 3   | 60447369 | 0.433 | 18   | 4.701  | 3.768  | 2.422  | 0.015436 | 0.095  |
| rs424675   | 3   | 60448261 | 0.433 | 18   | 4.701  | 3.768  | 2.422  | 0.015436 | 0.095  |
| rs17061176 | 3   | 59755841 | 0.179 | 11   | 4.311  | 3.188  | 2.414  | 0.015763 | 0.224  |
| rs13092167 | 3   | 59772342 | 0.293 | 10   | 4.244  | 3.148  | 2.392  | 0.016762 | 0.212  |
| rs3920477  | 3   | 60733152 | 0.328 | 15   | 4.425  | 3.484  | 2.371  | 0.017762 | 0.154  |
| rs9861525  | 3   | 60004908 | 0.398 | 15   | 4.756  | 4.157  | 2.332  | 0.019677 | 0.268  |
| rs241700   | 3   | 60516256 | 0.311 | 13   | 4.01   | 3.005  | 2.313  | 0.020728 | 0.235  |
| rs10451993 | 3   | 60566492 | 0.321 | 13   | 4.01   | 3.005  | 2.313  | 0.020728 | 0.235  |
| rs17669257 | 3   | 60566161 | 0.412 | 17   | 4.626  | 4.158  | 2.269  | 0.023295 | 0.271  |
| rs17609699 | 3   | 60487578 | 0.48  | 18   | -5.16  | 5.188  | -2.265 | 0.023496 | 0.27   |
| rs49413    | 3   | 59757484 | 0.418 | 20   | 5.311  | 5.546  | 2.255  | 0.024112 | 0.264  |
| rs993000   | 3   | 59745585 | 0.158 | 10   | 2.989  | 1.815  | 2.218  | 0.026535 | 0.4    |
| rs1683346  | 3   | 59749703 | 0.158 | 10   | 2.989  | 1.815  | 2.218  | 0.026535 | 0.4    |
| rs17061173 | 3   | 59754178 | 0.156 | 10   | 2.989  | 1.815  | 2.218  | 0.026535 | 0.4    |
| rs994931   | 3   | 59741758 | 0.319 | 15   | -4.661 | 4.506  | -2.196 | 0.028127 | 0.451  |
| rs780366   | 3   | 59762116 | 0.347 | 15   | -4.661 | 4.506  | -2.196 | 0.028127 | 0.451  |
| rs11130733 | 3   | 59767786 | 0.347 | 15   | -4.661 | 4.506  | -2.196 | 0.028127 | 0.451  |
| rs17361780 | 3   | 59772328 | 0.347 | 15   | -4.661 | 4.506  | -2.196 | 0.028127 | 0.451  |
| rs1627302  | 3   | 60658608 | 0.473 | 17   | -4.48  | 4.468  | -2.119 | 0.034058 | 0.27   |
| rs721207   | 3   | 60607896 | 0.468 | 16   | -5.031 | 5.672  | -2.112 | 0.034649 | 0.372  |
| rs780354   | 3   | 59772460 | 0.366 | 15   | -4.505 | 4.578  | -2.106 | 0.035223 | 0.478  |
| rs2682931  | 3   | 60631936 | 0.359 | 19   | -4.939 | 5.68   | -2.072 | 0.038225 | 0.261  |
| rs6766789  | 3   | 60090013 | 0.468 | 20   | -4.352 | 4.463  | -2.06  | 0.039397 | 0.349  |
| rs10780042 | 3   | 60090402 | 0.468 | 20   | -4.352 | 4.463  | -2.06  | 0.039397 | 0.349  |
| rs9881736  | 3   | 60487247 | 0.139 | 11   | 3.056  | 2.21   | 2.055  | 0.039836 | 0.5    |
| rs6786100  | 3   | 60351746 | 0.402 | 17   | 4.528  | 5.083  | 2.008  | 0.04461  | 0.302  |
| rs2142301  | 3   | 60095070 | 0.396 | 19   | -3.978 | 4.074  | -1.971 | 0.048745 | 0.18   |
| rs2885865  | 3   | 60610341 | 0.381 | 19   | -4.741 | 5.811  | -1.967 | 0.049201 | 0.292  |

|            |   |          |       |    |        |       |        |          |       |
|------------|---|----------|-------|----|--------|-------|--------|----------|-------|
| rs2363670  | 3 | 60611613 | 0.372 | 19 | -4.741 | 5.811 | -1.967 | 0.049201 | 0.292 |
| rs7633853  | 3 | 60613659 | 0.38  | 19 | -4.741 | 5.811 | -1.967 | 0.049201 | 0.292 |
| rs11926787 | 3 | 60615310 | 0.368 | 19 | -4.741 | 5.811 | -1.967 | 0.049201 | 0.292 |
| rs6762641  | 3 | 60616153 | 0.356 | 19 | -4.741 | 5.811 | -1.967 | 0.049201 | 0.292 |
| rs10510852 | 3 | 60616790 | 0.356 | 19 | -4.741 | 5.811 | -1.967 | 0.049201 | 0.292 |
| rs12637393 | 3 | 60620284 | 0.368 | 19 | -4.741 | 5.811 | -1.967 | 0.049201 | 0.292 |
| rs2856058  | 3 | 60625598 | 0.36  | 19 | -4.741 | 5.811 | -1.967 | 0.049201 | 0.292 |
| rs1735448  | 3 | 60647540 | 0.36  | 19 | -4.741 | 5.811 | -1.967 | 0.049201 | 0.292 |
| rs1716709  | 3 | 60657213 | 0.349 | 19 | -4.741 | 5.811 | -1.967 | 0.049201 | 0.292 |
| rs1716714  | 3 | 60660179 | 0.349 | 19 | -4.741 | 5.811 | -1.967 | 0.049201 | 0.292 |
| rs1735443  | 3 | 60662282 | 0.349 | 19 | -4.741 | 5.811 | -1.967 | 0.049201 | 0.292 |
| rs1735444  | 3 | 60664075 | 0.348 | 19 | -4.741 | 5.811 | -1.967 | 0.049201 | 0.292 |
| rs1716722  | 3 | 60681361 | 0.349 | 19 | -4.741 | 5.811 | -1.967 | 0.049201 | 0.292 |
| rs1735457  | 3 | 60683737 | 0.349 | 19 | -4.741 | 5.811 | -1.967 | 0.049201 | 0.292 |
| rs1735468  | 3 | 60703616 | 0.36  | 19 | -4.741 | 5.811 | -1.967 | 0.049201 | 0.292 |

**Supplementary Table S3.** Mutation burden of exonic variants of the 4 genes from 18q11.2 loci in FC IA compared with controls

| Loci    | Gene           | Number of exonic variants | MAC in each gene | P-value           | std error (SE) | permutations |
|---------|----------------|---------------------------|------------------|-------------------|----------------|--------------|
| 18q11.2 | <i>GATA6</i>   | 2                         | 2                | 0.731269          | 0.441789       | 1000         |
| 18q11.2 | <i>CTAGE1</i>  | 6                         | 174              | 0.0753849         | 0.371797       | 5000         |
| 18q11.2 | <i>RBBP8</i>   | 6                         | 43               | 0.0585883         | 0.376427       | 5000         |
| 18q11.2 | <i>CABLES1</i> | 3                         | 68               | <b>0.00559888</b> | 0.356104       | 5000         |

**Supplementary Table S4.** *CCDC80* exonic and splicing variants in FC IA cases and controls

| Position    | Annotation       | MAF (CEU) | SNP         | MAC in case | MAC in control |
|-------------|------------------|-----------|-------------|-------------|----------------|
| 3:112324305 | c.T2812C:p.Y938H | 0.01      | rs114697626 | 0           | 4              |
| 3:112328856 | c.C2394G:p.L798L | 0.002     | rs61732242  | 0           | 2              |
| 3:112357336 | c.C1417T:p.H473Y | 0.009     | rs116307644 | 4           | 1              |
| 3:112357537 | c.A1216G:p.R406G | 0         |             | 0           | 1              |
| 3:112357730 | c.G1023T:p.L341F | 0.01      | rs115738438 | 5           | 2              |
| 3:112357878 | c.C875A:p.A292E  | 0         |             | 0           | 1              |
| 3:112358168 | c.G585C:p.E195D  | 0         | rs370290734 | 0           | 1              |

|             |                 |       |             |   |   |
|-------------|-----------------|-------|-------------|---|---|
| 3:112358171 | c.T582A:p.G194G | 0.01  | rs116819563 | 5 | 2 |
| 3:112358658 | c.G95A:p.S32N   | 0.001 | rs75074453  | 0 | 1 |
| 3:112358761 | UTR5 c.-9G>T    | 0     |             | 0 | 1 |
